28 **Introductory paragraph (200 words)**

29 Pathogens experience pressure in an infection to adapt, with selection favoring  
30 mutants that persist. *Pseudomonas aeruginosa* commonly adapts by evolving  
31 mutants with hyper-biofilm production that evade clearance. Despite our  
32 understanding of the adaptive phenotypes, studying their emergence and dynamics  
33 in an infection has proven challenging. Here we used a porcine full-thickness burn  
34 wound model of chronic infection to study how mixed strains of *P. aeruginosa*  
35 adaptively evolve. Wounds were infected with six *P. aeruginosa* strains, including the  
36 model PA14 strain (PA14-1), and biopsies taken at 3, 14, and 28 days post-infection.  
37 Rugose small-colony variants (RSCVs) were detected at 3-d and persisted, with the  
38 majority evolved from PA14-1. Whole genome sequencing of PA14-1 RSCVs  
39 revealed driver mutations exclusively in the *wsp* pathway. RSCVs also acquired  
40 CRISPR-Cas adaptive immunity to prophages isolated from the *P. aeruginosa* wound  
41 isolate (B23-2) present in the inoculum. The rapid rise of RSCVs to detectable  
42 frequencies is evidence of positive selection of the Wsp chemosensory system and  
43 suggests that RSCVs may arise earlier in an infection than originally appreciated, to  
44 facilitate infection. Given the prevalence of RSCVs in chronic infections, we predict  
45 that RSCVs may be a common, early adaptation during infections.

46

47

48

49

50

51

52

53

54

55 Chronic infections are those that persist despite extensive treatment. These  
56 persistent infections are often attributed to difficult to eradicate biofilms, which are  
57 communities of adhered microorganisms encased in an extracellular polymeric  
58 substance (EPS) <sup>1,2</sup>. Complicating chronic infections is the high likelihood that  
59 bacterial populations adaptively evolve, producing persistent phenotypes with  
60 increased fitness.

61

62 One of the most understood bacterial adaptive responses to chronic infection is that  
63 of *Pseudomonas aeruginosa* to the cystic fibrosis (CF) lung <sup>3</sup>. CF patients exhibit  
64 mucus accumulation, where *P. aeruginosa* biofilms commonly colonize the mucus  
65 lining and establish persistent pulmonary infections <sup>4-6</sup>. Evolved phenotypic variants  
66 of this organism are routinely isolated from CF patient sputum samples, and several  
67 of these variants are often associated with worsening patient prognosis <sup>7</sup>. Of  
68 particular interest are the rugose small-colony variants (RSCVs), which are isolated  
69 from up to 50% of *P. aeruginosa*-positive CF sputum samples <sup>8,9</sup>. When isolated,  
70 their frequencies range drastically between 0.1 – 100% <sup>9,10</sup>. In contrast there is little-  
71 to-no reports of the frequency of *P. aeruginosa* adapted variants from other chronic  
72 infections, such as chronic wound infections.

73

74 Common to RSCVs are mutations in pathways that lead to elevated cyclic  
75 diguanylate monophosphate (c-di-GMP) <sup>7</sup>. C-di-GMP is a messenger molecule that  
76 signals the transition from planktonic to biofilm lifestyle in many bacteria <sup>11</sup>. In *P.*  
77 *aeruginosa*, increased c-di-GMP, among many responses, leads to overproduction of  
78 exopolysaccharides, Psl and Pel, and matrix proteins <sup>12,13</sup>. As a result, RSCVs have  
79 hyper-biofilm phenotypes <sup>13,14</sup>, increased tolerance to antimicrobials <sup>10</sup>, and enhanced  
80 resistance to immunity <sup>15,16</sup>. *P. aeruginosa* RSCVs also evolve from *in vitro* grown  
81 biofilms <sup>17,18</sup>, suggesting that there is strong selection for ecological diversification in  
82 both *in vivo* and *in vitro* biofilms.

83

84 RSCVs with driver mutations in the Wsp pathway, particularly *wspF*, are commonly  
85 isolated from CF sputum and *in vitro* biofilms<sup>12,19</sup>. The Wsp (wrinkly spreader)  
86 pathway is a chemosensory system that regulates c-di-GMP in response to surface  
87 sensing. Upon detecting a surface, the methyl-accepting chemotaxis protein (MCP),  
88 WspA, is methylated by the methyltransferase, WspC. WspA then interacts with the  
89 histidine kinase, WspE, which phosphorylates the diguanylate cyclase (DGC) WspR,  
90 resulting in c-di-GMP synthesis<sup>20-23</sup>. The methylesterase, WspF, de-methylates  
91 WspA, re-setting the system. Therefore, in *wspF* loss of function mutants, WspA  
92 remains methylated and the Wsp pathway continually activated, leading to  
93 overproduction of c-di-GMP<sup>24</sup>.

94

95 Despite our understanding of the divergent phenotypes of evolved variants, studying  
96 their emergence and the selective pressures driving their evolution *in vivo* is  
97 challenging, as there are few chronic infection models that mimic what is observed  
98 clinically. To address this challenge, we used a porcine full-thickness thermal injury  
99 wound model, which closely reflects human clinical chronic wounds<sup>25,26</sup>.  
100 Furthermore, chronic infection models typically only address the adaptive traits of a  
101 single founding clone, but susceptible individuals are constantly exposed to different  
102 strains of opportunistic pathogens. Here we used the porcine wound model in a *P.*  
103 *aeruginosa* mixed strain infection to understand which strains become prevalent and  
104 how they undergo genetic and phenotypic diversification.

105

## 106 **Results**

### 107 ***P. aeruginosa* strains PA14-1 and PAO1-B11 become dominant in a *P.*** 108 ***aeruginosa* mixed-strain chronic burn wound infection**

109 To determine relative fitness of different *P. aeruginosa* strains and if the population  
110 evolves in a chronic infection, we infected porcine full-thickness burn wounds with an

111 inoculum consisting of approximately equal numbers of 6 different *P. aeruginosa*  
112 strains. Wounds were infected with 2 model strains (PA14-1 and PAO1-B11), 3  
113 clinical isolates (B23-2, CF18-1 and S54485-1), and a water isolate (MSH10-2) (Fig  
114 1A, Table S1). Each strain had a unique nucleotide barcode introduced at the neutral  
115 *Tn7* site (Table S1). These strains share similar metabolic kinetics (Fig S1A, B) and  
116 biofilm formation capacity (Fig S1C). Biopsies were taken 3-, 14-, and 28-d post-  
117 infection for bacterial quantification (Fig S2).

118

119 Colony forming units (CFU) revealed a high bacterial burden at both 3-d and 14-d  
120 post infection. However, the bacterial levels from 14-d biopsies were more variable  
121 across replicates (Fig 1B), suggesting wounds had begun clearing the infection.  
122 Wounds remained colonized at approximately  $10^5$  bacteria up to 28-d (Fig 1B). To  
123 quantify the proportion of each strain across the sampled timepoints, genomic DNA  
124 was isolated from biopsy tissue and sequenced. As early as 3-d post infection, PA14-  
125 1 and PAO1-B11 were the predominant strains in the infection, outcompeting the 4  
126 other strains present (Fig 1C).

127

### 128 ***P. aeruginosa* evolves RSCVs during porcine chronic burn wound infections**

129 To determine if adapted *P. aeruginosa* variants emerged, we used colony  
130 morphologies as an indicator. Homogenized biopsies were grown on Vogel-Bonner  
131 minimal media supplemented with Congo red and brilliant blue (VBMM). RSCVs,  
132 defined by a matte, rugose colony morphology that stained intensely by the two dyes,  
133 indicating exopolysaccharide overproduction, were isolated from all three timepoints  
134 (Fig 2A). Two RSCV sub-populations were observed; one that had a pink, rugose  
135 phenotype and a second that had an orange, textured phenotype (Fig 2A).

136

137 The RSCV abundance in the wounds was quantified by expressing their frequency  
138 as a percentage of the total *P. aeruginosa* burden. The RSCV frequency was low in

139 the wounds on 3-d ( $0.02 \pm 0.12\%$ ) before peaking at 14-d, with a frequency of  
140 approximately 2% ( $2.15 \pm 5.25\%$ ) (Fig 2B). On 28-d, the RSCV frequency decreased  
141 to  $0.19 \pm 0.65\%$  of the total bacterial burden (Fig 1B, 2B). To determine if RSCVs  
142 experienced selective pressure in the wound, we calculated the selection coefficient,  
143 relative to the inoculum, at each timepoint across a range of possible starting  
144 frequencies according to equation (1). RSCVs showed significant positive selection  
145 across all time points with  $s > 0.1$  (Fig 2C). Selection of RSCVs was similar across all  
146 possible ranges on 3-d, while on 14-d and 28-d there was a gradual increase in  
147 selection coefficients. Despite the RSCV frequency decreasing on 28-d (Fig 2B), the  
148 RSCVs still showed significant positive selection in order to rise from undetectable  
149 frequencies to nearly 0.2% at 28-d (Fig 2C). This indicates that across all time points,  
150 RSCVs are adaptive.

151

152 RSCVs only evolved from the model strains PA14-1 and PAO1-B11 (Fig 2D). These  
153 also corresponded to the two RSCV phenotypes that were observed, with the pink  
154 RSCVs evolving from PA14-1, and the orange from PAO1-B11 (Fig 2A). RSCVs  
155 derived from PA14-1 were isolated across all timepoints and PAO1-B11 evolved  
156 RSCVs isolated from 14-d and 28-d. At the later two timepoints, PA14-1 RSCVs  
157 remained the predominant sub-population (Fig 2D).

158

159 **Whole genome sequencing reveals that PA14-1 RSCVs contain driver**  
160 **mutations exclusively within the *wsp* pathway**

161 As PA14-1 RSCVs were the predominate evolved phenotype, we focused on this  
162 sub-population for the remainder of the study. A description of the PAO1-B11  
163 variants will be communicated elsewhere. Whole genome sequencing was performed  
164 on 27 randomly selected PA14-1 RSCVs to identify the mutation(s) accounting for  
165 the RSCV phenotype.

166

167 We identified putative driver mutations exclusively in the *wsp* cluster, specifically,  
168 small deletions in *wspA* and *wspF*. (Table 1). We identified an in-frame 42bp deletion  
169 ( $\Delta 285 - 298$ aa) in *wspA* (*wspA*  $\Delta 285-298$ ), and a frame-shift 5bp deletion ( $\Delta 461 -$   
170 465bp) in *wspF* (*wspF* V154fs) (Table 1). RSCVs with the *wspA* mutation were  
171 predominant across all timepoints, with *wspF* mutants only identified on 14-d. Using  
172 RSCV-2 as a representative *wspA* mutant, the variant *wspA* was replaced on the  
173 genome by a wildtype copy. This resulted in the RSCV colony phenotype reverting to  
174 wildtype (Fig 3), demonstrating that the *wspA*  $\Delta 285-298$  mutation is responsible for  
175 the RSCV phenotype.

176

177 Some of the RSCVs also possessed secondary mutations (Table 1), demonstrating  
178 further evolution in the wound. Two *wspA* RSCVs from 3-d (Table 1; RSCV-1 and  
179 RSCV-4) acquired a 14,299bp deletion that removed the remaining *psl* operon. PA14  
180 naturally lacks Psl, since *pslA - pslD* are absent <sup>27</sup>. In these two isolates the  
181 remaining genes of the *psl* operon, *pslE - pslO* were deleted. Both of these PA14-1  
182 RSCVs were isolated from the same wound, however from separate biopsied tissue,  
183 suggesting that each deletion may have been a separate event. In the RSCV-1  
184 background, complementation of *wspA* reverted the RSCV colony phenotype to  
185 wildtype (Fig 3), indicating that deletion of the remaining *psl* operon did not influence  
186 the RSCV phenotype.

187

188 Evidence of further evolution of the *wsp* cluster was detected on 28-d. RSCV-40, in  
189 addition to having the *wspA*  $\Delta 285-298$  driver mutation, had 3 separate mutations in  
190 *wspD* which led to an early stop codon. This unusual mutation cluster is consistent  
191 with error-prone translesion synthesis or DNA template switching facilitated by micro-

192 homology<sup>28</sup>. However, as the mutations occur at the *wspD* 3' end, the WspD N-  
193 terminus may still be expressed and functional (Fig S3). WspD is a chaperone, which  
194 along with WspB, are predicted to tether WspA and WspE<sup>21</sup>. In this isolate,  
195 complementation of *wspA* reverted the RSCV colony phenotype to wildtype (Fig 3),  
196 indicating that the *wspD* mutations did not influence the RSCV phenotype. However,  
197 this further points towards the strong selective pressure on the Wsp pathway in the  
198 chronic infection.

199

200 As the driver mutations occurred in the *wsp* pathway, we predicted that the RSCV  
201 phenotype was due to overproduction of c-di-GMP. Using both a c-di-GMP *gfp*  
202 reporter<sup>29</sup> and a plasmid encoding the phosphodiesterase PA2133, we determined  
203 that both *wspA* and *wspF* mutants had elevated c-di-GMP levels compared to the  
204 ancestor PA14-1, and that elevated c-di-GMP levels was responsible for the RSCV  
205 colony phenotypes (Supplementary Results; Fig S4). These mutants also showed  
206 increased biofilm formation and outcompeted the ancestor strain when grown in *in*  
207 *vitro* planktonic and biofilm competition assays, with greater fitness values seen in  
208 the biofilm (Supplementary Results; Fig S5). The presence of secondary mutations  
209 did not appear to influence these phenotypes *in vitro*.

210

211 We were also interested in identifying how the PA14-1 non-RSCV population  
212 adapted to the infection, and if this population acquired mutations that did not result  
213 in divergent colony phenotypes. When we sequenced randomly selected PA14-1  
214 non-RSCV isolates, relatively few had acquired chromosomal mutations  
215 (Supplemental Results; Table S2). These isolates had similar levels of biofilm  
216 formation and metabolic kinetics compared to the ancestor strain (Supplemental  
217 Results; Fig S7), suggesting that the RSCVs were the major evolved sub-population  
218 within the wounds.



219

220 **WspA  $\Delta$ 285-298 mutation leads to auto-induction of the Wsp pathway**

221 As the *wspA*  $\Delta$ 285-298 was the most common driver mutation, we investigated how it  
222 may lead to elevated c-di-GMP production. We observed that flanking the junctions  
223 of this deletion was a direct repeat at 837-854bp and 921-938bp (Fig S8; bold text  
224 <sup>12</sup>).

225

226 The WspA  $\Delta$ 285-298 mutation occurs between the predicted HAMP domain (histidine  
227 kinases, adenylate cyclases, methyl accepting proteins, and phosphatases) and the  
228 signaling domain (SD; Fig 4A). MCP cytoplasmic domains are comprised of  
229 consecutive 7aa heptads <sup>30</sup>. MCPs are defined into classes based on the number of  
230 heptads in the cytoplasmic domain <sup>30</sup>, with *P. aeruginosa* WspA belonging to the 40H  
231 (40 heptads) MCP class <sup>31</sup>. The 285-298aa (14aa) deletion results in complete  
232 deletion of heptads N19 and N16 (Fig 4B).

233

234 To observe the localization of the deletion in the protein structure and gain insight  
235 into how the  $\Delta$ 285-298 mutation may alter the function and signaling of WspA, we  
236 generated a homology model of PA14 WspA against the *Thermotoga maritima* MCP  
237 (PDB 3JA6; <sup>32</sup>) (Fig 4C). Our homology model is also supported by the WspA Phyre  
238 secondary structure prediction <sup>33</sup> (Fig S9). Based on the model, the region of the  
239 deletion is predicted to occur opposite the methylation site (Fig 4C). We predict that  
240 the deletion could de-stabilize or alter the methylation site resulting in auto-induction  
241 of WspA and sustained WspR activation.

242

243 **Evidence of inter-pseudomonad competition mediated by phages in chronic**  
244 **infections**

245 Two PA14-1 RSCVs, RSCV-12 and RSCV-38, acquired a 60bp insertion at the  
246 clustered regularly interspaced short palindromic repeat (CRISPR) – CRISPR-  
247 associated proteins (Cas) locus (Table 1). Both sequences inserted at the intergenic  
248 region (-1549/+271) between PA14\_33350 (RS13600) and PA14\_33370 (RS13605)  
249 at the genomic position 2,937,205. The last 28bp of inserted sequence was identical  
250 between the two isolates and aligned to the repetitive elements in the PA14 CRISPR  
251 array (CRISPR2<sup>34</sup>) (Fig 5A). However, the first 32bp differed, indicative of CRISPR  
252 spacer sequences (Fig 5A), which are specific to infective mobile genetic elements  
253<sup>35</sup>. A BLAST search of the inserted CRISPR spacer against the ancestor strains  
254 identified that both insertions aligned to different contigs from strain B23-2 (See  
255 Supplemental Results; Fig S10).

256

257 We therefore predicted that RSCV-12 and -38 would be resistant to phages isolated  
258 from B23-2 due to CRISPR-Cas-acquired adaptive immunity. To test this, we grew  
259 B23-2 in mitomycin C and harvested the phage-enriched supernatant. *P. aeruginosa*  
260 strains were incubated with the phage lysate and plaque assays were performed.  
261 RSCV-12 and RSCV-38 displayed resistance to phage infection. RSCV-38 showed  
262 resistance across all replicates (Fig 5B). For RSCV-12, a single plaque was observed  
263 in 1 replicate, however for the remaining 3 replicates no plaques were observed (Fig  
264 5B). This indicates that the acquired CRISPR spacers in RSCV-12 and RSCV-38  
265 produced immunity to phages isolated from B23-2. Infection of RSCV-6 and RSCV-  
266 36 (CRISPR<sup>-</sup>), which have the same driver mutation as RSCV-12 and RSCV-38  
267 (CRISPR<sup>+</sup>) respectively, revealed that RSCVs were not natively more resistant to  
268 phage infection compared to the ancestor strain (Fig 5B). The ancestor strain  
269 susceptibility was also determined to assess the host range of the isolated phages.  
270 As expected, B23-2 was resistant to phage infection, while the remaining strains

271 showed varying levels of phage sensitivity (CF18-1>MSH10-2, S54485-1>PA14-1,  
272 PAO1-B11; Fig 5C).

273

## 274 **Discussion**

275 Here we describe the rapid evolution of adaptive *P. aeruginosa* mutants with  
276 conspicuous colony phenotypes arising in a clinically relevant model of chronic  
277 infection. There is a consensus in the field that variants arise in an infection as a  
278 consequence of adaptation over extended periods of time. However, we isolated  
279 RSCVs from early stages of infection, suggesting that variants may evolve more  
280 rapidly than originally appreciated. This suggests that RSCVs may be a common,  
281 early adaptation during infections and that the selective pressures driving RSCV  
282 evolution may persist across these infections.

283

284 Even though wounds were infected with six different *P. aeruginosa* strains, we only  
285 isolated RSCVs evolved from PA14-1 and PAO1-B11 (Fig 2C). We predict this is due  
286 to PA14-1 and PAO1-B11 outcompeting the remaining four strains early in the  
287 infection (Fig 1C). *P. aeruginosa* RSCVs were selected in the infection and in *in vitro*  
288 conditions (Fig 2C, S5B). The selection coefficients determined here were up to 5  
289 times greater than those identified in the Lenski long-term evolution lines<sup>36</sup>, pointing  
290 towards the strong positive selection experienced by RSCVs. Furthermore,  
291 *Burkholderia cenocepacia* variants containing *wsp* mutations isolated from an *in vitro*  
292 biofilm evolution assay similarly showed high selection coefficients<sup>37</sup>. This suggests  
293 that *wsp* mutants experience significant positive selection both *in vivo* and *in vitro*  
294 environments. Despite these strong selection coefficients, RSCVs remained at  
295 relatively low frequencies in the infection (Fig 2B). This suggests that RSCVs show  
296 negative frequency dependence, that is, they exert a strong advantage at low  
297 frequencies, but are disadvantageous at high frequencies. Negative frequency  
298 dependent selection has been previously observed for evolved rugose variants of *P.*

299 *fluorescens*<sup>38-40</sup>. Niche competition<sup>38,39</sup> and division of labor<sup>40</sup> with the ancestor  
300 strain drove the evolution of *P. fluorescens* rugose variants from static planktonic and  
301 colony growth respectively. In both cases, diversification of the population was  
302 maintained by negative frequency dependent selection<sup>38-40</sup>. The low frequency  
303 RSCVs would likely facilitate the ancestor strain in colonizing and establishing  
304 biofilms in the wound. We predict that in heterogeneous fitness landscapes, such as  
305 those encountered during infection, there are niche environments where the low  
306 frequency RSCVs would experience positive dependent frequency selection and  
307 become more common. In support of this hypothesis is the observation that the  
308 higher RSCV frequencies observed in CF patients are correlated to prolonged  
309 exposure to antimicrobials, particularly aerosolized antibiotics<sup>8,41</sup>.

310

311 All the sequenced PA14-1 RSCVs had driver mutations in the *wsp* cluster. This  
312 indicates that in chronic wounds the Wsp pathway specifically undergoes selection,  
313 and that *wsp* mutants may be more fit than other c-di-GMP-regulating pathways that  
314 confer the RSCV phenotype. The *wspA*  $\Delta$ 285-298 was the most common driver  
315 mutation and was isolated early in the infection (Table 1). There are two potential  
316 explanations for the rapid rise of this single *wspA* mutant in the infection. The first is  
317 that it may have been present in the initial inoculum at undetectable levels. The  
318 second is that this region may be hyper-mutable owing to the direct repeat (Fig S8).  
319 We are currently unable to discern between these two scenarios; however, it is  
320 significant that the population rapidly diversifies in the wound due to strong positive  
321 selection of adaptive phenotypes provided by *wsp* mutations.

322

323 Supporting the second theory is the observation that this region in *wspA* also  
324 appears to be under selection in driving RSCV evolution during *in vitro* grown biofilms  
325 (Fig S11). The *P. aeruginosa* PAO1 RSCV isolate MJK8, which evolved during  
326 biofilm growth in a tube reactor<sup>13</sup>, has an in-frame 66bp deletion ( $\Delta$ 286 – 307aa) in

327 the same region as *wspA*  $\Delta$ 285-298<sup>12</sup>. *P. fluorescens* Pf101 when grown as a colony  
328 biofilm evolved RSCVs with driver mutations identified in *wspC*, *wspA* and *wspE*<sup>40</sup>.  
329 One of the *wspA* mutations was a in-frame 84bp deletion ( $\Delta$ 284 – 311aa) again  
330 occurring in the homologous region<sup>40</sup>. Finally, *B. cenocepacia* HI2424 RSCVs with  
331 *wspA* and *wspE* mutations were isolated from a biofilm bead evolution experiment<sup>37</sup>.  
332 While the majority of mutations identified were non-synonymous SNPs, one of the  
333 *wspA* mutations was an in-frame 21bp deletion ( $\Delta$ 307-313aa) again in the  
334 homologous region<sup>37</sup> (Fig S11). We predict that these four deletions alter how WspA  
335 is methylated/demethylated and ultimately lead to constitutive signaling and auto-  
336 induction of the Wsp pathway.

337

338 In addition to driver mutations, some PA14-1 RSCVs also gained secondary  
339 mutations. Of particular interest was the  $\Delta$ 14,299bp, which deleted the remaining *psl*  
340 operon (Table 1; RSCV-1). We predicted that this deletion might lead to increased  
341 fitness of the RSCVs over the RSCV driver mutation alone. However, deletion of the  
342 remaining *psl* operon did not provide additional fitness benefits under the simple  
343 conditions tested. This suggests that in PA14 the remaining *psl* operon (*pslE* – *pslO*)  
344 may play a role outside of Psl synthesis, which may have a fitness cost in the wound  
345 environment.

346

347 Additional secondary mutations of interest were the 60bp insertions in the CRISPR-  
348 Cas array of RSCV-12 and RSCV-38 (Table 1, Fig 5A), which encoded resistance to  
349 phage(s) isolated from B23-2 (Fig 5C). It has only recently been confirmed that the *P.*  
350 *aeruginosa* type I-F CRISPR-Cas system provides adaptive immunity to phages with  
351 a target protospacer<sup>42</sup>. This is dependent on the presence of the correct protospacer  
352 adjacent motif (PAM) in the mobile genetic element<sup>42</sup>. In support of this, both  
353 protospacers contain the type I-F CRISPR-Cas specific GG PAM (Fig S10).

354 Furthermore, B23-2 contig-107 contained two additional protospacers to which  
355 CRISPR spacers in *P. aeruginosa* have been reported (Table S3, Fig S10A). Of  
356 interest was the observation that PA14 already contains a CRISPR spacer identical  
357 to a protospacer in contig-107 (Table S3, Fig S10A). This suggests that PA14 had  
358 already been exposed to the prophage in B23-2. However, the ancestral PA14-1 was  
359 still sensitive to infection (Fig 5B, C), presumably due to the incorrect PAM (Fig  
360 S10A). This highlights the importance of insertion of the correct CRISPR spacer in  
361 mediating phage immunity. This is only the second report of CRISPR-Cas acquired  
362 immunity in *P. aeruginosa* strains<sup>42</sup> and to our knowledge the first report of CRISPR-  
363 Cas adaptive immunity acquired in an infection.

364

365 Our data indicate that *P. aeruginosa* experiences strong selective forces in chronic  
366 infections, and in response rapidly evolve during the initial stages of infection. RSCVs  
367 containing mutations in the *wsp* cluster were the main adapted sub-population  
368 isolated from all wounds. This indicates that the Wsp system is the main pathway  
369 under selection to evolve adapted variants. This is despite other pathways in c-di-  
370 GMP regulation being implicated in RSCV formation, both *in vivo* and *in vitro*<sup>43-47</sup>.  
371 We predict that RSCVs may be an adaptation common to chronic infections and  
372 developing therapies that target the RSCV sub-population or prevent their  
373 emergence could be transferrable across these infections.

374

## 375 **Materials and Methods**

### 376 **Bacterial strains, plasmids and media**

377 Bacterial strains and plasmids used in this study are detailed in Table S1. Gene  
378 mutant constructs were made using Gibson Assembly (NEB)<sup>48</sup>. Primers used to  
379 create the constructs are detailed in Table S4. These were incorporated into the *P.*  
380 *aeruginosa* genome using two-step allelic recombination as previously described<sup>49</sup>.

381

382 *P. aeruginosa* strains were maintained on LANS (Luria agar no salt; 10g/L tryptone,  
383 5g/L yeast extract solidified with 1.5% agar) unless otherwise specified. RSCV colony  
384 morphology was observed on adjusted Vogel-Bonner minimal media (0.2g/L  
385 MgSO<sub>4</sub>•7H<sub>2</sub>O, 3.5g/L NaNH<sub>4</sub>HPO<sub>4</sub>•4H<sub>2</sub>O, 10g/L K<sub>2</sub>HPO<sub>4</sub>, 0.1g/L CaCl<sub>2</sub>, 2g/L citric  
386 acid, 1g/L casamino acid, 40µg/mL Congo red, 15µg/mL brilliant blue, solidified with  
387 1% agar; VBMM).

388

389 For *E. coli* strains, 10µg/mL gentamicin (gent), 100µg/mL ampicillin (amp) or  
390 15µg/mL tetracycline (tet) was used for selection where appropriate. For *P.*  
391 *aeruginosa* strains, 100µg/mL gent, 300µg/mL carbenicillin (carb) or 100µg/mL tet  
392 was used for selection where appropriate.

393

#### 394 **Porcine full-thickness chronic burn wound model**

395 Swine were housed and studied according to the protocols approved by the  
396 Institutional Animal Care and Use Committee (IACUC) at The Ohio State University.

397

398 Porcine full-thickness chronic burn wound model was performed as previously  
399 described<sup>25</sup>. Briefly, 2 pigs were subjected to thermal injury to achieve 6 full-  
400 thickness (third-degree) burns bilaterally and covered with impermeable wound  
401 dressings. Burn wounds were infected 3 days post injury with equal amounts of 6  
402 different *P. aeruginosa* strains to achieve a final 250µL inoculum at 10<sup>8</sup> bacteria (1.6  
403 x10<sup>7</sup> each for a total of 1 x 10<sup>8</sup>). The 250µL inoculum was spread over the wounds  
404 and allowed to air dry before the wound dressing was re-applied. Wounds were  
405 infected with PA14-1, PAO1-B11, B23-2, CF18-1 (GenBank ID; NZ\_KI519281),  
406 MSH10-2 (GenBank ID; NZ\_KE138672) and S54485-1 (GenBank ID; NZ\_KI519256).  
407 Prior to infection, each strain had been tagged with a unique barcode at the Tn7 site  
408 on the genome (see Supplementary Materials and Methods; Table 1).

409

410 Wound healing was monitored 3, 14, and 28 days post infection. At each timepoint,  
411 4-8 8mm punch biopsies were taken from 2 wounds on each pig (4 wounds for each  
412 timepoint, Fig S2). Biopsies were homogenized in 1mL PBS and plated on  
413 *Pseudomonas* isolation agar (PIA) supplemented with 100µg/mL gent for CFUs/ g  
414 tissue. To screen for the emergence of adapted *P. aeruginosa* variants,  
415 homogenized tissue was also plated onto VBMM supplemented with 100µg/mL gent.  
416 Colony morphology variants were passaged onto PIA followed by two rounds on non-  
417 selective LANS, before being plated back onto VBMM (without antibiotics) to confirm  
418 that the variant phenotype was a result of a stable mutation. Confirmed colony  
419 variants were stored at -80°C.

420

421 The selection of RSCVs in the wound was determined by calculating the selection  
422 coefficient (s) according to equation (1)<sup>50</sup>

$$s = \frac{\ln\left(\frac{N_{mx}}{N_{m0}}\right) - \ln\left(\frac{N_{wtx}}{N_{wt0}}\right)}{T_x} \quad (1)$$

423 where  $T_x$  is day x, N is the number of cells, m is the mutant and wt is the wildtype at  
424 day x and day 0.

425

### 426 **Colony morphology**

427 1µL of overnight culture was spotted on VBMM plates and incubated at 37°C for 24h.  
428 Colonies were imaged on a Stereo Microscope (AmScope) fitted with a Microscope  
429 Digital Color CMOS camera (AmScope). Images were processed in FIJI<sup>51</sup>.

430

### 431 **Sequencing and analysis**

432 To determine the frequency of each strain across the infection, genomic DNA was  
433 isolated from porcine tissue and the barcodes were sequenced as follows. Tissue  
434 was added to 2mL Goodman's buffer A (100 mM NaCl, 100 mM Tris-HCl pH 8, 10



435 mM EDTA pH 8, 3.33% SDS, 0.1% sodium deoxycholate) in a bead beater tube with  
436 0.1mm glass beads and 2-3mm zirconia beads. The tissue was lysed by placing  
437 tubes in a TissueLyser II (QIAGEN) for 30s at 50Hz. This was repeated 4 times,  
438 placing tubes on ice for 30s in between each lysis round to prevent tubes from  
439 overheating. Lysed tissue was incubated with 50 $\mu$ L proteinase K (20mg/mL) for 3h at  
440 55°C. 2mL of phenol, chloroform, isomyl alcohol solution (25:24:1, pH 8) was added  
441 and samples were centrifuged for 5min at room temperature. The aqueous phase  
442 was removed and mixed with 1.5mL isopropanol. Sample was incubated for 30min at  
443 -20°C before being centrifuged for 30min at 4°C. The pellet was washed in 1mL 75%  
444 EtOH and again centrifuged. EtOH was removed and the DNA pellet air-dried and  
445 resuspended in 500 $\mu$ L sterile water. Strain-specific barcodes were amplified and  
446 given Illumina sequencing adapters using Tn7\_F and Tn7\_R primers indicated in  
447 Table S4. The PCR was performed using Expand Long-Template Polymerase  
448 (Roche) as described in the Supplementary Materials and Methods. Library  
449 sequencing pools were sequenced on NextSeq and MiniSeq High Output SE75 runs  
450 at the Petit Institute Molecular Evolution Core Facility at Georgia Institute of  
451 Technology. Between 43,789 and 4,938,784 reads were obtained per sample.  
452 Analysis script is available on github  
453 ([https://github.com/glew8/Barcode\\_Sequencing](https://github.com/glew8/Barcode_Sequencing)). Briefly, FastQC 0.11.7 and MultiQC  
454 v1.5 were used to confirm sufficient sequencing quality<sup>52,53</sup>. Cutadapt 1.13 was used  
455 to select only those sequences with the insert sequence, isolate barcode sequence,  
456 and parse reads containing each barcode<sup>54</sup>. Then egrep was used to count reads  
457 with each barcode. As a final check, FastQC was used to identify overrepresented  
458 sequences that don't match any of the queried barcodes.  
459  
460 To identify the ancestor strain that the isolated RSCVs evolved from, colony PCRs  
461 were performed using primers specific to each ancestor strain. The forward primer  
462 contained the unique barcode used to tag each ancestor strain at the Tn7 site.

463 Therefore, for each RSCV, 6 PCRs were performed. Primers are indicated in Table  
464 S4.

465

466 To identify mutations, genomic DNA was isolated from colony variants using the  
467 DNeasy Blood and Tissue Kit (Qiagen) according to the manufactures protocol.  
468 Clonal DNA was sequenced on an Illumina NextSeq 500 using a modified protocol  
469 for library prep using the Illumina Nextera kit <sup>55</sup>. 2x151bp sequencing reads for  
470 selected isolates were trimmed and quality filtered using Trimmomatic v0.36  
471 (settings: LEADING:20 TRAILING:20 SLIDINGWINDOW:4:20 MINLEN:70) <sup>56</sup>. The  
472 reads passing quality filtering were then used for variant calling with the open-source  
473 program *breseq* v0.30.0 using default settings <sup>57</sup>. The reference sequences for  
474 variant calling were acquired from NCBI's RefSeq database (NC\_002516.2 for  
475 PAO1, NC\_008463.1 for PA14).

476

#### 477 **Homology modelling**

478 The PA14 WspA sequence was obtained from the Pseudomonas genome database  
479 <sup>58</sup>. The sequence was submitted to SWISS-MODEL using a template search <sup>59</sup>.  
480 Quality of the returned homology models was assessed on the Global Model Quality  
481 Estimation (GMQE) score (numbers closer to 1 indicate more accurate model) and  
482 the QMEAN score (numbers closer to 0 indicate that the model is comparable to  
483 experimental structures). The homology model of PA14 WspA against the MCP of  
484 *Thermotoga maritima* (PDB 3JA6; <sup>32</sup>) was determined to be the most accurate. The  
485 homology model had a GMQE score of 0.37 and QMEAN score of -1.68.

486

#### 487 **Prophage isolation and plaque assay**

488 To isolate prophages from B23-2, an overnight culture of B23-2 was diluted 1:100  
489 and incubated for 30min at 37°C shaking at 200rpm. 0.5µg/mL of mitomycin C was  
490 added to the culture and the OD<sub>600nm</sub> was measured. The culture was re-incubated

491 and the OD<sub>600nm</sub> measured every h. When the OD<sub>600nm</sub> began to decrease the cells  
492 were pelleted by centrifugation and the supernatant filter sterilized and stored at 4°C.

493

494 To determine the level of susceptibility of *P. aeruginosa* strains to the  
495 bacteriophage(s) isolated from B23-2, 100 – 200µL of mid-log *P. aeruginosa* culture  
496 was incubated with 100µL serial dilutions of bacteriophage lysate for 15min at 37°C.

497 The infection was added to 5mL molten soft agar (LB solidified with 0.7% agar)  
498 supplemented with 10mM CaCl<sub>2</sub> and MgSO<sub>4</sub>. This was then poured over solidified  
499 hard agar (LB solidified with 1.5% agar), allowed to solidify and incubated overnight.

500 The number of resulting plaques was then counted and PFU/mL determined.

501

## 502 **Statistical Analysis**

503 Data are presented as mean ± SD. To determine if data conformed to a normal  
504 distribution a Shapiro-Wilk test was performed. All of the data sets were normally  
505 distributed except for the PFU/mL data (Figure 5). For these data sets, means were  
506 compared using the non-parametric t-test. All other comparisons were made using a  
507 one-way ANOVA with a Tukey's post-hoc test and Student's t-test. Analyses were  
508 performed using GraphPad Prism v.5 (Graphpad Software). Statistical significance  
509 was determined using a p-value <0.05.

510

## 511 **Data Availability**

512 All sequencing reads from isolates are deposited in NCBI SRA under Bioproject  
513 number PRJNA491911 and Biosample accession numbers SAMN10101410 -  
514 SAMN10101459.

515

516 **Acknowledgements.** We would like to thank Michael Kann for his help with the  
517 planktonic and biofilm fitness assays.

518

519 **References**

- 520 1 Costerton, J. W. *et al.* Bacterial biofilms in nature and disease. *Annu Rev*  
521 *Microbiol* **41**, 435-464, doi:10.1146/annurev.mi.41.100187.002251 (1987).
- 522 2 Hall-Stoodley, L., Costerton, J. W. & Stoodley, P. Bacterial biofilms: from the  
523 natural environment to infectious diseases. *Nature reviews. Microbiology* **2**,  
524 95-108, doi:10.1038/nrmicro821 (2004).
- 525 3 Hogardt, M. & Heesemann, J. Adaptation of *Pseudomonas aeruginosa* during  
526 persistence in the cystic fibrosis lung. *International journal of medical*  
527 *microbiology : IJMM* **300**, 557-562, doi:10.1016/j.ijmm.2010.08.008 (2010).
- 528 4 Lam, J., Chan, R., Lam, K. & Costerton, J. W. Production of mucoid  
529 microcolonies by *Pseudomonas aeruginosa* within infected lungs in cystic  
530 fibrosis. *Infection and immunity* **28**, 546-556 (1980).
- 531 5 Singh, P. K. *et al.* Quorum-sensing signals indicate that cystic fibrosis lungs  
532 are infected with bacterial biofilms. *Nature* **407**, 762-764,  
533 doi:10.1038/35037627 (2000).
- 534 6 Ciofu, O., Tolker-Nielsen, T., Jensen, P. O., Wang, H. & Hoiby, N.  
535 Antimicrobial resistance, respiratory tract infections and role of biofilms in lung  
536 infections in cystic fibrosis patients. *Advanced drug delivery reviews* **85**, 7-23,  
537 doi:10.1016/j.addr.2014.11.017 (2015).
- 538 7 Evans, T. J. Small colony variants of *Pseudomonas aeruginosa* in chronic  
539 bacterial infection of the lung in cystic fibrosis. *Future microbiology* **10**, 231-  
540 239, doi:10.2217/fmb.14.107 (2015).
- 541 8 Haussler, S., Tummler, B., Weissbrodt, H., Rohde, M. & Steinmetz, I. Small-  
542 colony variants of *Pseudomonas aeruginosa* in cystic fibrosis. *Clinical*  
543 *infectious diseases : an official publication of the Infectious Diseases Society*  
544 *of America* **29**, 621-625 (1999).
- 545 9 Thomassen, M. J., Demko, C. A., Boxerbaum, B., Stern, R. C. & Kuchenbrod,  
546 P. J. Multiple isolates of *Pseudomonas aeruginosa* with differing antimicrobial  
547 susceptibility patterns from patients with cystic fibrosis. *Journal of Infectious*  
548 *Diseases* **140**, 873-880 (1979).
- 549 10 Drenkard, E. & Ausubel, F. M. *Pseudomonas* biofilm formation and antibiotic  
550 resistance are linked to phenotypic variation. *Nature* **416**, 740-743 (2002).
- 551 11 Hengge, R. Principles of c-di-GMP signalling in bacteria. *Nature reviews.*  
552 *Microbiology* **7**, 263-273, doi:10.1038/nrmicro2109 (2009).
- 553 12 Starkey, M. *et al.* *Pseudomonas aeruginosa* rugose small-colony variants  
554 have adaptations that likely promote persistence in the cystic fibrosis lung.  
555 *Journal of bacteriology* **191**, 3492-3503, doi:10.1128/jb.00119-09 (2009).
- 556 13 Kirisits, M. J., Prost, L., Starkey, M. & Parsek, M. R. Characterization of  
557 colony morphology variants isolated from *Pseudomonas aeruginosa* biofilms.  
558 *Applied and environmental microbiology* **71**, 4809-4821,  
559 doi:10.1128/aem.71.8.4809-4821.2005 (2005).
- 560 14 Ma, L., Jackson, K. D., Landry, R. M., Parsek, M. R. & Wozniak, D. J.  
561 Analysis of *Pseudomonas aeruginosa* conditional psl variants reveals roles  
562 for the psl polysaccharide in adhesion and maintaining biofilm structure  
563 postattachment. *Journal of bacteriology* **188**, 8213-8221,  
564 doi:10.1128/jb.01202-06 (2006).
- 565 15 Mishra, M. *et al.* *Pseudomonas aeruginosa* Psl polysaccharide reduces  
566 neutrophil phagocytosis and the oxidative response by limiting complement-  
567 mediated opsonization. *Cellular microbiology* **14**, 95-106, doi:10.1111/j.1462-  
568 5822.2011.01704.x (2012).
- 569 16 Pestrak, M. J. *et al.* *Pseudomonas aeruginosa* rugose small-colony variants  
570 evade host clearance, are hyper-inflammatory, and persist in multiple host  
571 environments. *PLoS pathogens* **14**, e1006842,  
572 doi:10.1371/journal.ppat.1006842 (2018).

- 573 17 Boles, B. R., Thoendel, M. & Singh, P. K. Self-generated diversity produces  
574 "insurance effects" in biofilm communities. *Proc Natl Acad Sci U S A* **101**,  
575 16630-16635, doi:10.1073/pnas.0407460101 (2004).
- 576 18 Flynn, K. M. *et al.* The evolution of ecological diversity in biofilms of  
577 *Pseudomonas aeruginosa* by altered cyclic diguanylate signaling. *Journal of*  
578 *bacteriology*, doi:10.1128/jb.00048-16 (2016).
- 579 19 Smith, E. E. *et al.* Genetic adaptation by *Pseudomonas aeruginosa* to the  
580 airways of cystic fibrosis patients. *Proceedings of the National Academy of*  
581 *Sciences* **103**, 8487-8492 (2006).
- 582 20 Huangyutitham, V., Guvener, Z. T. & Harwood, C. S. Subcellular clustering of  
583 the phosphorylated WspR response regulator protein stimulates its  
584 diguanylate cyclase activity. *mBio* **4**, e00242-00213, doi:10.1128/mBio.00242-  
585 13 (2013).
- 586 21 O'Connor, J. R., Kuwada, N. J., Huangyutitham, V., Wiggins, P. A. &  
587 Harwood, C. S. Surface sensing and lateral subcellular localization of WspA,  
588 the receptor in a chemosensory-like system leading to c-di-GMP production.  
589 *Molecular microbiology* **86**, 720-729, doi:10.1111/mmi.12013 (2012).
- 590 22 Guvener, Z. T. & Harwood, C. S. Subcellular location characteristics of the  
591 *Pseudomonas aeruginosa* GGDEF protein, WspR, indicate that it produces  
592 cyclic-di-GMP in response to growth on surfaces. *Molecular microbiology* **66**,  
593 1459-1473, doi:10.1111/j.1365-2958.2007.06008.x (2007).
- 594 23 D'Argenio, D. A., Calfee, M. W., Rainey, P. B. & Pesci, E. C. Autolysis and  
595 autoaggregation in *Pseudomonas aeruginosa* colony morphology mutants.  
596 *Journal of bacteriology* **184**, 6481-6489 (2002).
- 597 24 Hickman, J. W., Tifrea, D. F. & Harwood, C. S. A chemosensory system that  
598 regulates biofilm formation through modulation of cyclic diguanylate levels.  
599 *Proc Natl Acad Sci U S A* **102**, 14422-14427, doi:10.1073/pnas.0507170102  
600 (2005).
- 601 25 Roy, S. *et al.* Mixed-species biofilm compromises wound healing by disrupting  
602 epidermal barrier function. *The Journal of pathology* **233**, 331-343,  
603 doi:10.1002/path.4360 (2014).
- 604 26 Chaney, S. B. *et al.* Histopathological comparisons of *Staphylococcus aureus*  
605 and *Pseudomonas aeruginosa* experimental infected porcine burn wounds.  
606 *Wound repair and regeneration : official publication of the Wound Healing*  
607 *Society [and] the European Tissue Repair Society* **25**, 541-549,  
608 doi:10.1111/wrr.12527 (2017).
- 609 27 Friedman, L. & Kolter, R. Two genetic loci produce distinct carbohydrate-rich  
610 structural components of the *Pseudomonas aeruginosa* biofilm matrix.  
611 *Journal of bacteriology* **186**, 4457-4465 (2004).
- 612 28 Loytynoja, A. & Goldman, N. Short template switch events explain mutation  
613 clusters in the human genome. *Genome research* **27**, 1039-1049,  
614 doi:10.1101/gr.214973.116 (2017).
- 615 29 Rybtke, M. T. *et al.* Fluorescence-based reporter for gauging cyclic di-GMP  
616 levels in *Pseudomonas aeruginosa*. *Applied and environmental microbiology*  
617 **78**, 5060-5069, doi:10.1128/aem.00414-12 (2012).
- 618 30 Alexander, R. P. & Zhulin, I. B. Evolutionary genomics reveals conserved  
619 structural determinants of signaling and adaptation in microbial  
620 chemoreceptors. *Proceedings of the National Academy of Sciences* **104**,  
621 2885-2890 (2007).
- 622 31 Ortega, D. R. *et al.* Assigning chemoreceptors to chemosensory pathways in  
623 *Pseudomonas aeruginosa*. *Proceedings of the National Academy of*  
624 *Sciences*, 201708842 (2017).
- 625 32 Cassidy, C. K. *et al.* CryoEM and computer simulations reveal a novel kinase  
626 conformational switch in bacterial chemotaxis signaling. *eLife* **4**, e08419  
627 (2015).

- 628 33 Kelley, L. A., Mezulis, S., Yates, C. M., Wass, M. N. & Sternberg, M. J. The  
629 Phyre2 web portal for protein modeling, prediction and analysis. *Nature*  
630 *protocols* **10**, 845 (2015).
- 631 34 Cady, K. *et al.* Prevalence, conservation and functional analysis of Yersinia  
632 and Escherichia CRISPR regions in clinical Pseudomonas aeruginosa  
633 isolates. *Microbiology (Reading, England)* **157**, 430-437 (2011).
- 634 35 Barrangou, R. & Marraffini, L. A. CRISPR-Cas systems: prokaryotes upgrade  
635 to adaptive immunity. *Molecular cell* **54**, 234-244 (2014).
- 636 36 Khan, A. I., Dinh, D. M., Schneider, D., Lenski, R. E. & Cooper, T. F. Negative  
637 epistasis between beneficial mutations in an evolving bacterial population.  
638 *Science (New York, N.Y.)* **332**, 1193-1196 (2011).
- 639 37 Cooper, V. S., Staples, R. K., Traverse, C. C. & Ellis, C. N. Parallel evolution  
640 of small colony variants in Burkholderia cenocepacia biofilms. *Genomics* **104**,  
641 447-452, doi:10.1016/j.ygeno.2014.09.007 (2014).
- 642 38 Rainey, P. B. & Rainey, K. Evolution of cooperation and conflict in  
643 experimental bacterial populations. *Nature* **425**, 72 (2003).
- 644 39 Rainey, P. B. & Travisano, M. Adaptive radiation in a heterogeneous  
645 environment. *Nature* **394**, 69 (1998).
- 646 40 Kim, W., Levy, S. B. & Foster, K. R. Rapid radiation in bacteria leads to a  
647 division of labour. *Nature communications* **7**, 10508 (2016).
- 648 41 Hogardt, M. & Heesemann, J. Adaptation of Pseudomonas aeruginosa during  
649 persistence in the cystic fibrosis lung. *International Journal of Medical*  
650 *Microbiology* **300**, 557-562 (2010).
- 651 42 Cady, K. C., Bondy-Denomy, J., Heussler, G. E., Davidson, A. R. & O'Toole,  
652 G. A. The CRISPR/Cas adaptive immune system of Pseudomonas  
653 aeruginosa mediates resistance to naturally occurring and engineered  
654 phages. *Journal of bacteriology*, JB. 01184-01112 (2012).
- 655 43 Ueda, A. & Wood, T. K. Connecting quorum sensing, c-di-GMP, pel  
656 polysaccharide, and biofilm formation in Pseudomonas aeruginosa through  
657 tyrosine phosphatase TpbA (PA3885). *PLoS Path.* **5**, e1000483 (2009).
- 658 44 Malone, J. G. *et al.* YfiBNR mediates cyclic-di-GMP dependent small colony  
659 variant formation and persistence in Pseudomonas aeruginosa. *PLoS Path.* **6**,  
660 e1000804 (2010).
- 661 45 Giddens, S. R. *et al.* Mutational activation of niche-specific genes provides  
662 insight into regulatory networks and bacterial function in a complex  
663 environment. *Proc. Natl. Acad. Sci. U. S. A.* **104**, 18247-18252 (2007).
- 664 46 Jones, C. J. *et al.* ChIP-Seq and RNA-Seq reveal an AmrZ-mediated  
665 mechanism for cyclic di-GMP synthesis and biofilm development by  
666 Pseudomonas aeruginosa. *PLoS Path.* **10**, e1003984,  
667 doi:10.1371/journal.ppat.1003984 (2014).
- 668 47 Irie, Y. *et al.* Pseudomonas aeruginosa biofilm matrix polysaccharide Psl is  
669 regulated transcriptionally by RpoS and post-transcriptionally by RsmA. *Mol.*  
670 *Microbiol.* **78**, 158-172 (2010).
- 671 48 Gibson, D. G. *et al.* Enzymatic assembly of DNA molecules up to several  
672 hundred kilobases. *Nature methods* **6**, 343-345 (2009).
- 673 49 Choi, K.-H. & Schweizer, H. P. An improved method for rapid generation of  
674 unmarked Pseudomonas aeruginosa deletion mutants. *BMC microbiology* **5**,  
675 30 (2005).
- 676 50 Cooper, V. S. Experimental Evolution as a High-Throughput Screen for  
677 Genetic Adaptations. *mSphere* **3**, doi:10.1128/mSphere.00121-18 (2018).
- 678 51 Schindelin, J. *et al.* Fiji: an open-source platform for biological-image analysis.  
679 *Nature methods* **9**, 676 (2012).
- 680 52 Andrews, S. FastQC: a quality control tool for high throughput sequence data.  
681 (2010).

- 682 53 Ewels, P., Magnusson, M., Lundin, S. & Källér, M. MultiQC: summarize  
683 analysis results for multiple tools and samples in a single report.  
684 *Bioinformatics* **32**, 3047-3048 (2016).
- 685 54 Martin, M. Cutadapt removes adapter sequences from high-throughput  
686 sequencing reads. *EMBnet. journal* **17**, pp. 10-12 (2011).
- 687 55 Baym, M. *et al.* Inexpensive multiplexed library preparation for megabase-  
688 sized genomes. *PloS one* **10**, e0128036, doi:10.1371/journal.pone.0128036  
689 (2015).
- 690 56 Bolger, A. M., Lohse, M. & Usadel, B. Trimmomatic: a flexible trimmer for  
691 Illumina sequence data. *Bioinformatics* **30**, 2114-2120 (2014).
- 692 57 Deatherage, D. E. & Barrick, J. E. in *Engineering and analyzing multicellular*  
693 *systems* 165-188 (Springer, 2014).
- 694 58 Winsor, G. L. *et al.* Enhanced annotations and features for comparing  
695 thousands of *Pseudomonas* genomes in the *Pseudomonas* genome  
696 database. *Nucleic acids research* **44**, D646-D653 (2015).
- 697 59 Guex, N., Peitsch, M. C. & Schwede, T. Automated comparative protein  
698 structure modeling with SWISS - MODEL and Swiss - PdbViewer: A historical  
699 perspective. *Electrophoresis* **30** (2009).

700

701

702

703

704

705

706

707

708

709

710

711

712

713

714

715

716

717

718

719 **Table 1: Mutations identified in PA14-1 RSCVs**

| Sample                |        |             | Driver mutation |                       |          | Secondary mutation                                            |                                                          |
|-----------------------|--------|-------------|-----------------|-----------------------|----------|---------------------------------------------------------------|----------------------------------------------------------|
| Day                   | RSCV # | Wound#      | Gene            | Mutation <sup>a</sup> | Freq (%) | Gene                                                          | Mutation                                                 |
| 3                     | 1      | 1           | <i>wspA</i>     | 285-298del            |          | <i>pslO-pslE</i>                                              | Δ14,299 bp                                               |
|                       | 2      | 2           | <i>wspA</i>     | 285-298del            |          | <i>pslO-pslE</i>                                              | Δ14,299 bp                                               |
|                       | 4      | 1           | <i>wspA</i>     | 285-298del            |          | PA14_13130/PA14_13140<br><i>fabI/ppiD</i>                     | TNN→TGC<br>TTC → TCC                                     |
| <b>Day 3 summary</b>  |        |             | <i>wspA</i>     | 285-298del            | 100      |                                                               |                                                          |
| 14                    | 3      | 4           | <i>wspA</i>     | 285-298del            |          | CRISPR-Cas1/hp<br>glutamyl-tRNA reductase<br><i>fabI/ppiD</i> | +60bp<br>L71L (CTG→TTG)<br>TTC → TCC                     |
|                       | 6      | 4           | <i>wspA</i>     | 285-298del            |          |                                                               |                                                          |
|                       | 7      | 4           | <i>wspA</i>     | 285-298del            |          |                                                               |                                                          |
|                       | 8      | 4           | <i>wspA</i>     | 285-298del            |          |                                                               |                                                          |
|                       | 9      | 4           | <i>wspA</i>     | 285-298del            |          |                                                               |                                                          |
|                       | 10     | 4           | <i>wspA</i>     | 285-298del            |          |                                                               |                                                          |
|                       | 12     | 4           | <i>wspA</i>     | 285-298del            |          |                                                               |                                                          |
|                       | 13     | 1           | <i>wspA</i>     | 285-298del            |          |                                                               |                                                          |
|                       | 14     | 4           | <i>wspA</i>     | 285-298del            |          |                                                               |                                                          |
|                       | 16     | 4           | <i>wspA</i>     | 285-298del            |          |                                                               |                                                          |
|                       | 17     | 4           | <i>wspA</i>     | 285-298del            |          |                                                               |                                                          |
|                       | 20     | 4           | <i>wspF</i>     | V154fs                |          |                                                               |                                                          |
|                       | 24     | 1           | <i>wspA</i>     | 285-298del            |          |                                                               |                                                          |
|                       | 27     | 1           | <i>wspA</i>     | 285-298del            |          |                                                               |                                                          |
|                       | 28     | 2           | <i>wspA</i>     | 285-298del            |          |                                                               |                                                          |
| 36                    | 3      | <i>wspF</i> | V154fs          |                       |          |                                                               |                                                          |
| 37                    | 3      | <i>wspA</i> | 285-298del      |                       |          |                                                               |                                                          |
| 38                    | 3      | <i>wspF</i> | V154fs          |                       |          |                                                               |                                                          |
| 86                    | 3      | <i>wspA</i> | 285-298del      |                       |          |                                                               |                                                          |
| <b>Day 14 summary</b> |        |             | <i>wspA</i>     | 285-298del            | 84.2     |                                                               |                                                          |
|                       |        |             | <i>wspF</i>     | V154fs                | 15.8     |                                                               |                                                          |
| 28                    | 40     | 1           | <i>wspA</i>     | 285-298del            |          | <i>wspD</i><br>PA14_54090                                     | 1 bp→TT<br>2 bp→AG<br>S197S (TCG→TCA)<br>A248V (GCG→GTG) |
|                       | 42     | 3           | <i>wspA</i>     | 285-298del            |          |                                                               |                                                          |
|                       | 43     | 3           | <i>wspA</i>     | 285-298del            |          |                                                               |                                                          |
|                       | 45     | 3           | <i>wspA</i>     | 285-298del            |          |                                                               |                                                          |
|                       | 87     | 2           | <i>wspA</i>     | 285-298del            |          |                                                               |                                                          |
| <b>Day 28 summary</b> |        |             | <i>wspA</i>     | 285-298del            | 100      |                                                               |                                                          |

720 <sup>a</sup> Deleted amino acid residues are indicated  
 721 del: deletion, fs: frame shift, hp: hypothetical protein  
 722



723 **Figure legends**

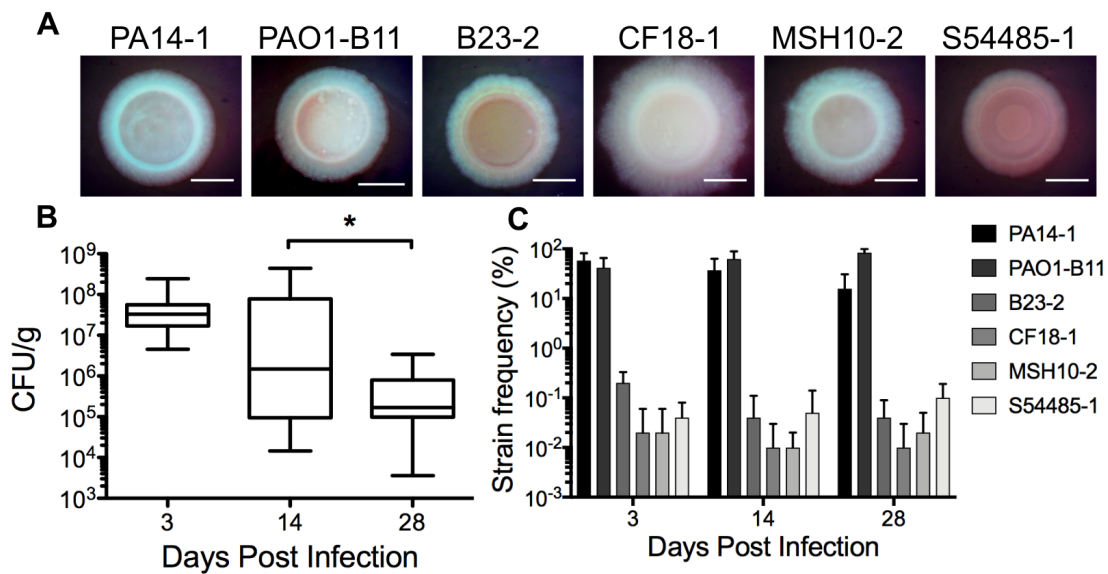

724

725 **Figure 1: *P. aeruginosa* burden in a mixed-strain chronic burn wound infection**

726 **(A)** Colony morphology on VBMM of the 6 *P. aeruginosa* strains used to infect

727 porcine burn wounds. Scale bar 2mm. **(B)** Biopsies were taken from wounds at 3, 14

728 and 28-d. Biopsies were homogenized and plated for CFU/g. Each biopsy was plated

729 in triplicate, with a minimum of 4 biopsies taken from each wound. \* p-value <0.05.

730 **(C)** Genomic DNA was isolated from homogenized biopsies and the strain specific

731 barcodes at the *Tn7* site sequenced. The proportion of strain barcodes was

732 expressed as a percentage of the total sequence reads to determine the relative

733 frequency of each strain during the infection. A minimum of 4 biopsies from each

734 wound was sequenced.

735

736

737

738

739

740

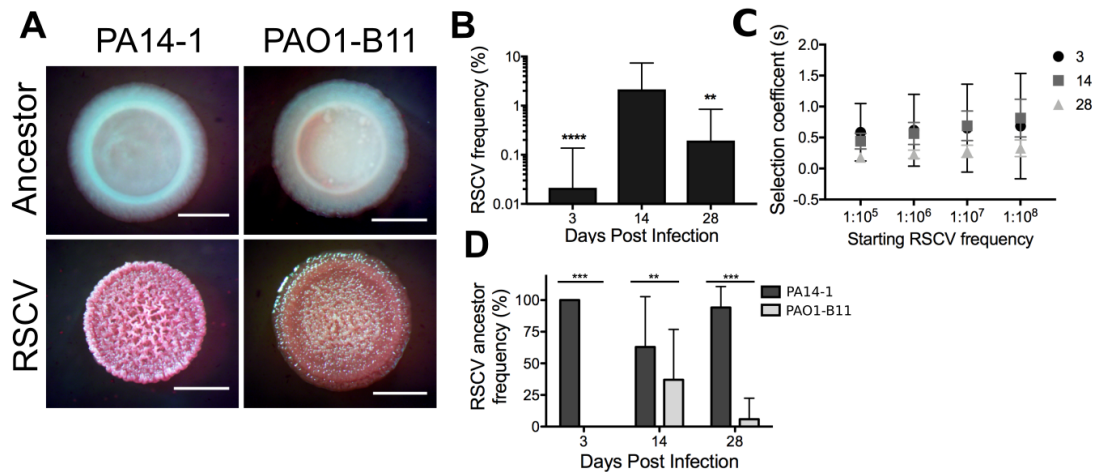

741

742 **Figure 2: *P. aeruginosa* RSCVs isolated from porcine chronic burn wound**

743 **infections. (A)** Representative colony morphologies of RSCVs isolated from  
744 homogenized porcine burn wound tissue. RSCVs were plated on VBMM and the  
745 colony morphology was compared to the ancestor strain (labelled). Scale bar 2mm.

746 **(B)** Frequencies of RSCVs isolated at each timepoint, expressed as a percentage of  
747 the total *P. aeruginosa* population. Data presented as mean  $\pm$  SD. \*\* p-value <0.01,  
748 \*\*\*\* p-value <0.0001 compared to 14-d. **(C)** Selection coefficient (s) of RSCVs in the

749 wound determined at each timepoint across a range of starting frequencies at t=0.

750 **(D)** Frequency of the ancestor strain that the RSCVs evolved from, expressed as a  
751 percentage of the total RSCV sub-population. Data presented as mean  $\pm$  SD. \*\* p-  
752 value <0.01, \*\*\* p-value <0.001.

753

754

755

756

757

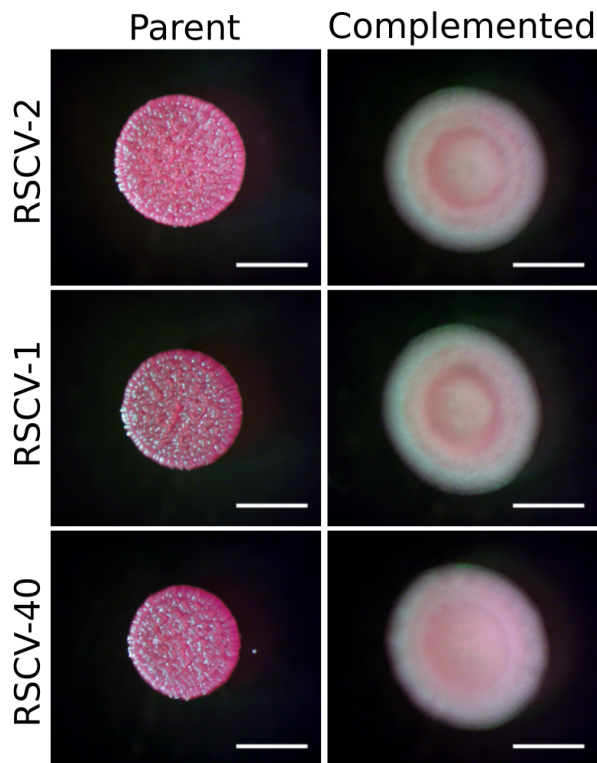

758

759 **Figure 3: Complementation of the *wspA*Δ42bp mutation.** *wspA* was  
760 complemented in representative RSCVs by replacing *wspA* Δ285-298 with a wildtype  
761 copy on the genome. RSCV-2 was selected as a representative RSCV with the *wspA*  
762 driver mutation alone. RSCV-1 and RSCV-40 have the *wspA* driver mutation as well  
763 as *ΔpsIE-psIO* and *wspD* secondary mutations, respectively. Parent and  
764 complemented RSCVs (labeled) were grown on VBMM and colony morphology was  
765 assessed. Scale bar 2mm.

766

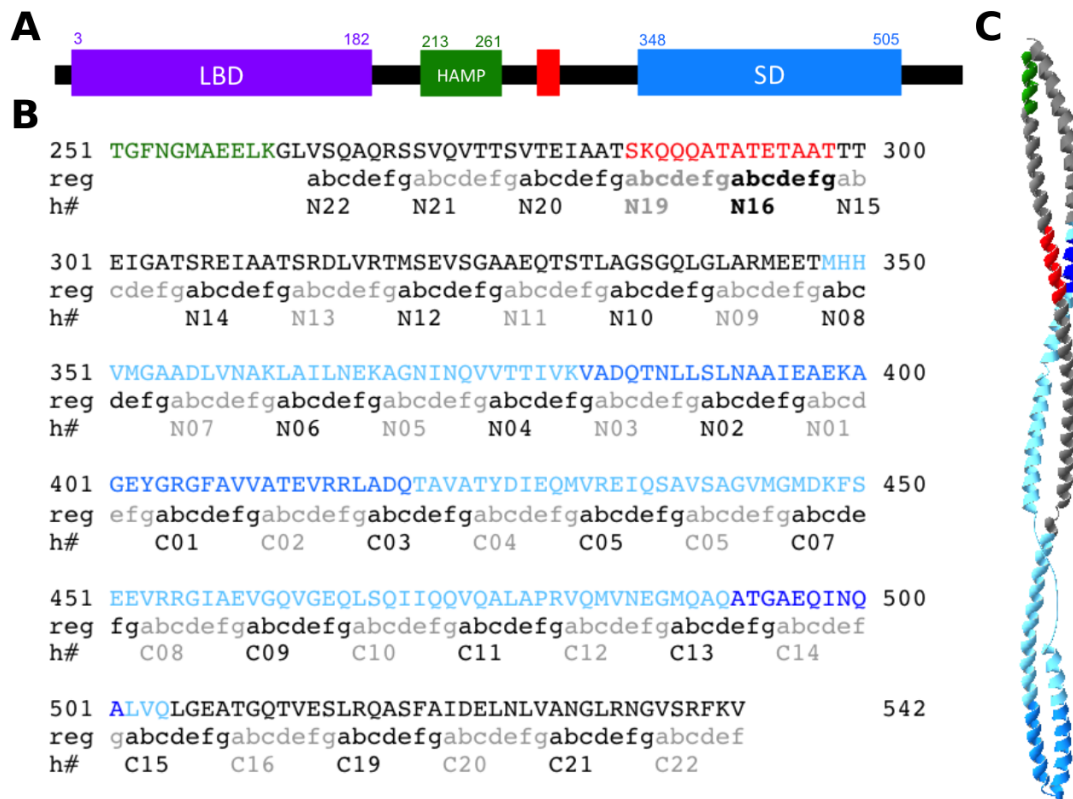

767

768

769 **Figure 4: 14aa deletion in WspA is predicted to occur opposite the methylation**

770 **site. (A)** Schematic of WspA. The different domains of WspA were determined from

771 the *Pseudomonas* Genome Database<sup>58</sup> Pfam analysis. LBD = ligand binding domain

772 or the four helix bundle domain (3-182aa). HAMP = linker domain (213-261aa). SD =

773 MCP signaling domain (348-505aa). The region of the 14aa deletion is indicated in

774 red (285-298aa). **(B)** The WspA cytoplasmic domain amino acid sequence. The full

775 amino acid sequence and predicted secondary structure of WspA is depicted in Fig

776 S6. The domains are indicated by the same colors in **(A)**. The signaling domain

777 contains two additional features, the kinase interacting subdomain, or ‘tip’ domain in

778 dark blue (382-420aa) and the predicated methylation site in navy blue (492-501aa)

779<sup>31</sup>. Both the heptad registers (reg) and the heptad number (h#) are labeled<sup>30,31</sup>, with

780 consecutive heptads indicated in alternating black and grey text. **(C)** Homology

781 model of PA14 WspA modeled against the *T. maritime* MCP (PDB 3JA6;<sup>32</sup>)

782 generated using SWISS-MODEL<sup>59</sup>. Colors correspond to the domains indicated in  
 783 (B). Model spans 250-541aa of WspA.

784

785

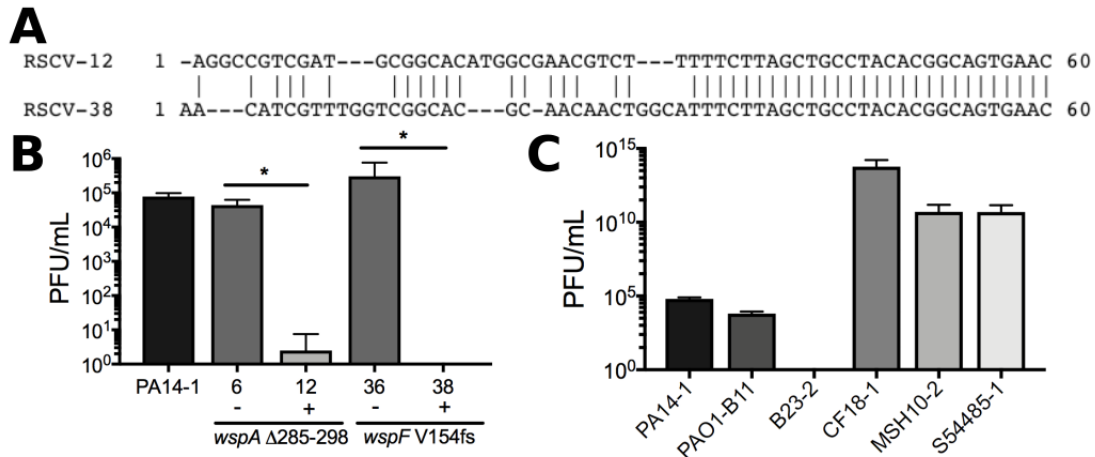

786

787 **Figure 5: RSCV-12 and RSCV-38 are resistant to infection by phage isolated**

788 **from B23-2. (A)** The 60bp insertion sequence in the CRISPR array of RSCV-12 and

789 RSCV-38. Prophages were isolated from B23-2 and plaque assays were performed

790 to determine the level of phage infection for (B) representative RSCV isolates and

791 (C) the ancestor wildtype *P. aeruginosa* strains. RSCV-6 and RSCV-12 both have the

792 same driver *wspA* mutation, while RSCV-36 and RSCV-38 have the same driver

793 *wspF* mutation. ± indicates the presence/absence of the CRISPR insertion. The

794 driver mutation for each RSCV is labelled. Data presented as mean ± SD, n=4. \* p-

795 value <0.05.

796

797
